# Supplementary material
Source: Springer Nature journal article supplement (https://www.springermedizin.de/resource/supplementary/12943_2010_693_MOESM5_ESM.pdf/9554592)

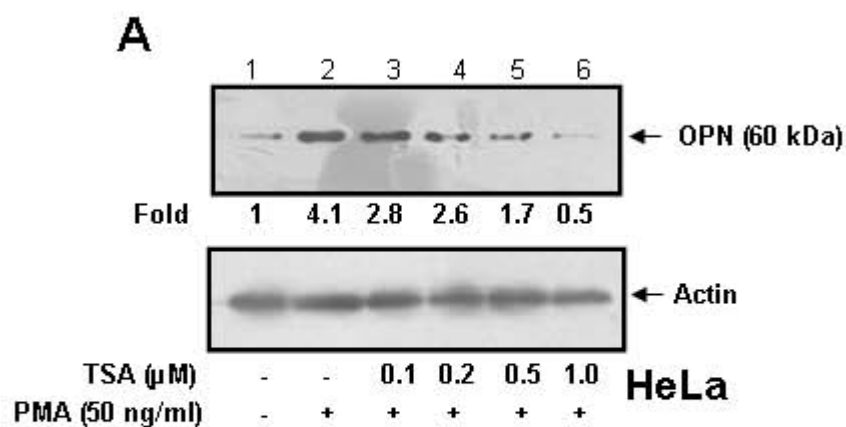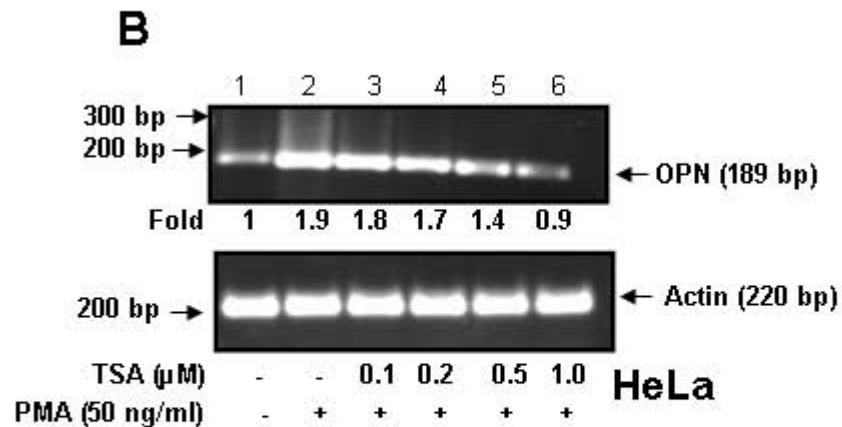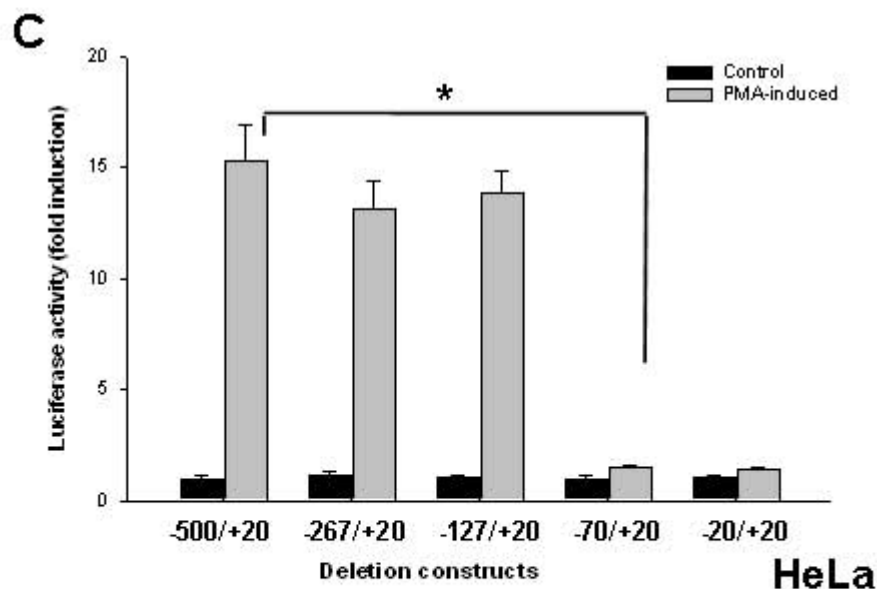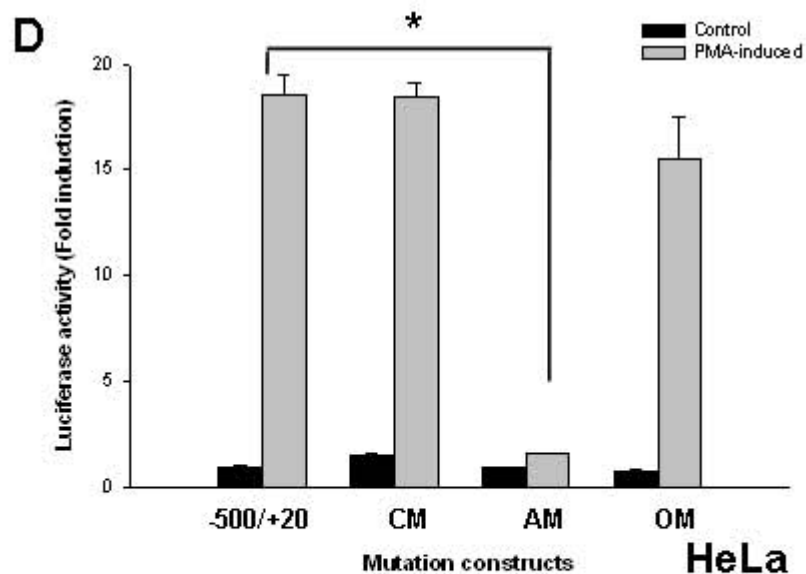

Supplement: MOESM5 [file 9554592]
